# Supplementary material for: Improved multi-elemental analyses by inductively coupled plasma-sector field mass spectrometry through methane addition to the plasma
Source: Royal Society of Chemistry journal article supplement (doi:10.1039/b507886e), 2005-01-01
Supplement: b507886e.pdf [file b507886e.pdf]

## **Improved multi-elemental analyses by inductively coupled plasma – sector field mass spectrometry through methane addition to the plasma**

I. Rodushkin,<sup>\*a,b</sup> P. Nordlund,<sup>b</sup> E. Engström<sup>a</sup> and D.C. Baxter<sup>b</sup>

<sup>a</sup> *Division of Applied Geology, Luleå University of Technology, S-971 87 Luleå, Sweden*

<sup>b</sup> *Analytica AB, Aurorum 10, S-971 87 Luleå, Sweden. E-mail: [ilia.rodushkin@analytica.se](mailto:ilia.rodushkin@analytica.se)*

### **Electronic Supplementary Information**

Tables showing analyte sensitivities (Table A) and background equivalent concentrations (Table B) at selected methane gas flow rates. Methane was added through a port in the spray chamber via a mass-flow controller. At each methane flow rate the sensitivity for <sup>115</sup>In was optimized.

**Table A.** Analyte sensitivity (counts s<sup>-1</sup> per ng l<sup>-1</sup>) at different methane flow rates.

| Methane flow rate/ml min <sup>-1</sup> | 0    | 1.8  | 3.0  | 6.0  |
|----------------------------------------|------|------|------|------|
| <sup>107</sup> Ag (LR)                 | 650  | 650  | 550  | 410  |
| <sup>109</sup> Ag (LR)                 | 630  | 620  | 530  | 380  |
| <sup>27</sup> Al (MR)                  | 31   | 32   | 28   | 24   |
| <sup>75</sup> As (LR)                  | 120  | 300  | 460  | 410  |
| <sup>197</sup> Au (LR)                 | 470  | 670  | 780  | 600  |
| <sup>11</sup> B (LR)                   | 110  | 100  | 81   | 64   |
| <sup>138</sup> Ba (LR)                 | 1400 | 1500 | 1300 | 1000 |
| <sup>9</sup> Be (LR)                   | 74   | 74   | 76   | 73   |
| <sup>209</sup> Bi (LR)                 | 1800 | 2000 | 2000 | 1500 |
| <sup>79</sup> Br (MR)                  | 3    | 4    | 3    | 3    |
| <sup>44</sup> Ca(MR)                   | 1.5  | 1.6  | 1.2  | 0.9  |
| <sup>111</sup> Cd(LR)                  | 120  | 130  | 120  | 100  |
| <sup>114</sup> Cd(LR)                  | 280  | 290  | 280  | 240  |
| <sup>140</sup> Ce(LR)                  | 1000 | 1800 | 1600 | 1200 |
| <sup>59</sup> Co(MR)                   | 39   | 40   | 34   | 26   |
| <sup>52</sup> Cr(MR)                   | 24   | 28   | 27   | 21   |
| <sup>133</sup> Cs(LR)                  | 1500 | 1600 | 1400 | 1100 |
| <sup>63</sup> Cu(MR)                   | 23   | 23   | 21   | 16   |
| <sup>163</sup> Dy(LR)                  | 580  | 640  | 550  | 410  |
| <sup>167</sup> Er(LR)                  | 510  | 580  | 500  | 380  |
| <sup>151</sup> Eu(LR)                  | 1000 | 1100 | 930  | 700  |
| <sup>153</sup> Eu(LR)                  | 1100 | 1200 | 1000 | 760  |
| <sup>56</sup> Fe(MR)                   | 42   | 47   | 43   | 37   |
| <sup>69</sup> Ga(MR)                   | 22   | 25   | 22   | 17   |
| <sup>71</sup> Ga(MR)                   | 15   | 17   | 15   | 12   |
| <sup>157</sup> Gd(LR)                  | 580  | 390  | 310  | 230  |
| <sup>160</sup> Gd(LR)                  | 540  | 610  | 520  | 400  |
| <sup>70</sup> Ge(MR)                   | 3.7  | 4.7  | 4.6  | 3.9  |
| <sup>72</sup> Ge(MR)                   | 5.1  | 5.8  | 5.7  | 5.0  |
| <sup>178</sup> Hf(LR)                  | 440  | 610  | 570  | 430  |
| <sup>180</sup> Hf(LR)                  | 560  | 790  | 730  | 550  |
| <sup>202</sup> Hg(LR)                  | 110  | 150  | 190  | 170  |
| <sup>165</sup> Ho(LR)                  | 2300 | 2600 | 2200 | 1700 |
| <sup>127</sup> I(LR)                   | 550  | 740  | 930  | 820  |
| <sup>115</sup> In(LR)                  | 1300 | 1400 | 1300 | 1000 |
| <sup>115</sup> In(MR)                  | 85   | 90   | 82   | 62   |
| <sup>191</sup> Ir(LR)                  | 680  | 790  | 720  | 540  |
| <sup>193</sup> Ir(LR)                  | 1100 | 1300 | 1200 | 900  |
| <sup>39</sup> K(HR)                    | 5.2  | 4.8  | 4.4  | 3.4  |
| <sup>139</sup> La(LR)                  | 1000 | 1900 | 1700 | 1300 |
| <sup>7</sup> Li(LR)                    | 210  | 210  | 170  | 130  |
| <sup>175</sup> Lu(LR)                  | 2200 | 2400 | 2100 | 1600 |
| <sup>26</sup> Mg(MR)                   | 2.1  | 2.3  | 2.1  | 1.7  |
| <sup>55</sup> Mn(MR)                   | 42   | 47   | 43   | 36   |
| <sup>98</sup> Mo(LR)                   | 240  | 320  | 300  | 250  |
| <sup>23</sup> Na(MR)                   | 26   | 30   | 24   | 19   |
| <sup>93</sup> Nb(LR)                   | 860  | 1200 | 1100 | 900  |
| <sup>143</sup> Nd(LR)                  | 240  | 280  | 250  | 180  |
| <sup>146</sup> Nd(LR)                  | 340  | 400  | 350  | 230  |
| <sup>60</sup> Ni(MR)                   | 11   | 11   | 10   | 8    |

| Methane flow rate/ml min <sup>-1</sup> | 0    | 1.8  | 3.0  | 6.0  |
|----------------------------------------|------|------|------|------|
| <sup>31</sup> P(MR)                    | 1.6  | 2.8  | 4.6  | 4.5  |
| <sup>208</sup> Pb(LR)                  | 1100 | 1100 | 1000 | 760  |
| <sup>105</sup> Pd(LR)                  | 360  | 330  | 290  | 230  |
| <sup>106</sup> Pd(LR)                  | 420  | 410  | 370  | 290  |
| <sup>108</sup> Pd(LR)                  | 370  | 390  | 360  | 280  |
| <sup>141</sup> Pr(LR)                  | 1700 | 2300 | 2000 | 1500 |
| <sup>194</sup> Pt(LR)                  | 420  | 490  | 470  | 360  |
| <sup>195</sup> Pt(LR)                  | 420  | 500  | 480  | 370  |
| <sup>196</sup> Pt(LR)                  | 320  | 380  | 360  | 270  |
| <sup>85</sup> Rb(LR)                   | 800  | 840  | 710  | 560  |
| <sup>185</sup> Re(LR)                  | 750  | 910  | 860  | 660  |
| <sup>187</sup> Re(LR)                  | 1300 | 1500 | 1400 | 1100 |
| <sup>103</sup> Rh(LR)                  | 1500 | 1700 | 1500 | 1200 |
| <sup>99</sup> Ru(LR)                   | 210  | 240  | 220  | 170  |
| <sup>101</sup> Ru(LR)                  | 490  | 540  | 490  | 390  |
| <sup>102</sup> Ru(LR)                  | 150  | 180  | 160  | 130  |
| <sup>32</sup> S(MR)                    | 16   | 19   | 17   | 13   |
| <sup>121</sup> Sb(LR)                  | 300  | 450  | 620  | 560  |
| <sup>123</sup> Sb(LR)                  | 230  | 350  | 480  | 430  |
| <sup>45</sup> Sc(MR)                   | 32   | 38   | 33   | 26   |
| <sup>82</sup> Se(LR)                   | 20   | 35   | 41   | 35   |
| <sup>28</sup> Si(MR)                   | 17   | 19   | 18   | 24   |
| <sup>147</sup> Sm(LR)                  | 320  | 350  | 300  | 230  |
| <sup>149</sup> Sm(LR)                  | 300  | 320  | 280  | 210  |
| <sup>118</sup> Sn(LR)                  | 350  | 380  | 350  | 280  |
| <sup>120</sup> Sn(LR)                  | 480  | 530  | 480  | 380  |
| <sup>88</sup> Sr(LR)                   | 1200 | 1300 | 1100 | 890  |
| <sup>181</sup> Ta(LR)                  | 1300 | 1900 | 1800 | 1400 |
| <sup>159</sup> Tb(LR)                  | 2300 | 2600 | 2200 | 1700 |
| <sup>125</sup> Te(LR)                  | 33   | 57   | 73   | 60   |
| <sup>126</sup> Te(LR)                  | 88   | 150  | 200  | 160  |
| <sup>232</sup> Th(LR)                  | 1200 | 2500 | 2500 | 1800 |
| <sup>47</sup> Ti(MR)                   | 2.2  | 2.5  | 2.2  | 1.7  |
| <sup>205</sup> Tl(LR)                  | 1600 | 1600 | 1500 | 1100 |
| <sup>169</sup> Tm(LR)                  | 2300 | 2600 | 2200 | 1700 |
| <sup>238</sup> U(LR)                   | 1900 | 2800 | 2700 | 1900 |
| <sup>184</sup> W(LR)                   | 530  | 700  | 680  | 530  |
| <sup>51</sup> V(MR)                    | 26   | 32   | 30   | 23   |
| <sup>89</sup> Y(LR)                    | 1200 | 1500 | 1300 | 1100 |
| <sup>171</sup> Yb(LR)                  | 350  | 370  | 310  | 230  |
| <sup>173</sup> Yb(LR)                  | 400  | 420  | 350  | 260  |
| <sup>66</sup> Zn(MR)                   | 6.3  | 7.3  | 7.1  | 6.8  |
| <sup>90</sup> Zr(LR)                   | 490  | 690  | 630  | 510  |

**Table B.** Background equivalent concentrations (ng l<sup>-1</sup>) monitored in 0.14 M HNO<sub>3</sub> solution at different methane flow rates.

| Methane flow rate/ml min <sup>-1</sup> | 0    | 1.2  | 2.4  | 3.0      | 4.8        | 6.0         | 7.2         |
|----------------------------------------|------|------|------|----------|------------|-------------|-------------|
| <sup>107</sup> Ag (LR)                 | 2.0  | 1.9  | 1.8  | 1.9      | 2.2        | 2.1         | 2.4         |
| <sup>109</sup> Ag (LR)                 | 1.8  | 1.6  | 1.8  | 2.0      | 2.1        | 2.2         | 2.3         |
| <sup>27</sup> Al (MR)                  | 34   | 45   | 43   | 51       | 48         | <b>61</b>   | <b>84</b>   |
| <sup>75</sup> As (LR)                  | 55   | 37   | 22   | 15       | 13         | <b>28</b>   | <b>72</b>   |
| <sup>197</sup> Au (LR)                 | 0.2  | 0.3  | 0.3  | 0.2      | 0.2        | 0.2         | <b>0.8</b>  |
| <sup>11</sup> B (LR)                   | 15   | 14   | 14   | 16       | 17         | 18          | 20          |
| <sup>138</sup> Ba (LR)                 | 3.1  | 3.2  | 3.7  | 3.3      | 3.3        | 3.3         | 3.2         |
| <sup>9</sup> Be (LR)                   | 0.08 | 0.14 | 0.06 | 0.09     | 0.03       | 0.08        | 0.08        |
| <sup>209</sup> Bi (LR)                 | 0.04 | 0.03 | 0.04 | 0.05     | 0.03       | 0.04        | 0.04        |
| <sup>79</sup> Br (MR)                  | 10   | 7    | 9    | 19       | 16         | 25          | 29          |
| <sup>44</sup> Ca(MR)                   | 26   | 24   | 18   | 11       | 11         | 17          | 18          |
| <sup>111</sup> Cd(LR)                  | 0.2  | 0.3  | 0.3  | 0.2      | 0.2        | 0.2         | <b>0.8</b>  |
| <sup>114</sup> Cd(LR)                  | 0.4  | 0.5  | 0.5  | 0.4      | 0.4        | 0.4         | <b>1.6</b>  |
| <sup>140</sup> Ce(LR)                  | 0.2  | 0.2  | 0.2  | 0.2      | 0.2        | 0.3         | <b>0.4</b>  |
| <sup>59</sup> Co(MR)                   | 0.2  | 0.2  | 0.2  | 0.2      | 0.2        | <b>0.4</b>  | <b>0.5</b>  |
| <sup>52</sup> Cr(MR)                   | 2    | 3    | 3    | <b>5</b> | <b>8</b>   | <b>19</b>   | <b>47</b>   |
| <sup>133</sup> Cs(LR)                  | 0.03 | 0.05 | 0.03 | 0.03     | 0.03       | 0.04        | 0.04        |
| <sup>63</sup> Cu(MR)                   | 12   | 13   | 11   | 8        | 9          | 15          | <b>20</b>   |
| <sup>163</sup> Dy(LR)                  | 0.01 | 0.01 | 0.01 | 0.01     | 0.02       | 0.02        | <b>0.08</b> |
| <sup>167</sup> Er(LR)                  | 0.01 | 0.01 | 0.01 | 0.01     | 0.01       | 0.01        | 0.01        |
| <sup>151</sup> Eu(LR)                  | 0.04 | 0.04 | 0.03 | 0.05     | 0.07       | <b>0.13</b> | <b>0.41</b> |
| <sup>153</sup> Eu(LR)                  | 0.03 | 0.03 | 0.03 | 0.04     | 0.04       | <b>0.07</b> | <b>0.16</b> |
| <sup>56</sup> Fe(MR)                   | 17   | 17   | 16   | 17       | 16         | 22          | 26          |
| <sup>69</sup> Ga(MR)                   | 0.1  | 0.1  | 0.2  | 0.1      | 0.1        | 0.1         | <b>0.3</b>  |
| <sup>71</sup> Ga(MR)                   | 0.0  | 0.0  | 0.0  | 0.0      | 0.0        | 0.0         | 0.0         |
| <sup>157</sup> Gd(LR)                  | 0.05 | 0.03 | 0.03 | 0.02     | 0.03       | 0.03        | 0.03        |
| <sup>160</sup> Gd(LR)                  | 0.04 | 0.03 | 0.03 | 0.03     | 0.04       | 0.03        | 0.02        |
| <sup>70</sup> Ge(MR)                   | 0.1  | 0.1  | 1.5  | 2.3      | 0.5        | 0.5         | 0.8         |
| <sup>72</sup> Ge(MR)                   | 1.1  | 5.3  | 3.4  | 2.1      | 2.4        | 1.5         | 0.8         |
| <sup>178</sup> Hf(LR)                  | 0.02 | 0.04 | 0.03 | 0.03     | 0.03       | <b>0.06</b> | <b>0.14</b> |
| <sup>180</sup> Hf(LR)                  | 0.02 | 0.03 | 0.03 | 0.04     | 0.02       | 0.02        | <b>0.04</b> |
| <sup>202</sup> Hg(LR)                  | 3.8  | 4.1  | 4.0  | 3.9      | 4.5        | 6.9         | <b>12</b>   |
| <sup>165</sup> Ho(LR)                  | 0.00 | 0.00 | 0.00 | 0.00     | 0.00       | 0.01        | <b>0.02</b> |
| <sup>127</sup> I(LR)                   | 13   | 22   | 18   | 18       | 17         | 16          | 32          |
| <sup>191</sup> Ir(LR)                  | 0.01 | 0.00 | 0.01 | 0.00     | 0.00       | 0.00        | <b>0.05</b> |
| <sup>193</sup> Ir(LR)                  | 0.00 | 0.00 | 0.00 | 0.00     | 0.00       | 0.01        | 0.01        |
| <sup>39</sup> K(HR)                    | 40   | 30   | 30   | 40       | 40         | 30          | 60          |
| <sup>139</sup> La(LR)                  | 0.2  | 0.2  | 0.2  | 0.2      | 0.2        | 0.2         | <b>0.4</b>  |
| <sup>7</sup> Li(LR)                    | 2    | 2    | 2    | 2        | 2          | 2           | 2           |
| <sup>175</sup> Lu(LR)                  | 0.00 | 0.00 | 0.00 | 0.00     | 0.00       | 0.00        | 0.00        |
| <sup>26</sup> Mg(MR)                   | 30   | 30   | 30   | 20       | 20         | 30          | 30          |
| <sup>55</sup> Mn(MR)                   | 8    | 8    | 8    | 8        | 7          | 8           | 7           |
| <sup>98</sup> Mo(LR)                   | 0.4  | 0.4  | 0.3  | 0.4      | 0.5        | 0.8         | <b>2</b>    |
| <sup>23</sup> Na(MR)                   | 40   | 50   | 40   | 60       | <b>190</b> | <b>900</b>  | <b>1200</b> |
| <sup>93</sup> Nb(LR)                   | 0.05 | 0.05 | 0.07 | 0.04     | 0.06       | <b>0.2</b>  | <b>0.6</b>  |
| <sup>143</sup> Nd(LR)                  | 0.2  | 0.2  | 0.2  | 0.2      | 0.2        | 0.2         | 0.2         |
| <sup>146</sup> Nd(LR)                  | 0.2  | 0.2  | 0.2  | 0.2      | 0.2        | 0.2         | 0.2         |
| <sup>60</sup> Ni(MR)                   | 30   | 40   | 40   | 40       | 60         | <b>70</b>   | <b>110</b>  |

| Methane flow rate/ml min <sup>-1</sup> | 0    | 1.2  | 2.4  | 3.0  | 4.8         | 6.0         | 7.2         |
|----------------------------------------|------|------|------|------|-------------|-------------|-------------|
| <sup>31</sup> P(MR)                    | 100  | 80   | 90   | 90   | 90          | 90          | <b>300</b>  |
| <sup>208</sup> Pb(LR)                  | 0.4  | 0.4  | 0.4  | 0.3  | 0.3         | 0.3         | 0.3         |
| <sup>105</sup> Pd(LR)                  | 0.7  | 0.6  | 0.4  | 0.5  | 0.7         | 1           | <b>4</b>    |
| <sup>106</sup> Pd(LR)                  | 0.3  | 0.3  | 0.2  | 0.2  | 0.2         | 0.3         | <b>0.6</b>  |
| <sup>108</sup> Pd(LR)                  | 0.2  | 0.2  | 0.2  | 0.2  | 0.2         | 0.2         | <b>0.5</b>  |
| <sup>141</sup> Pr(LR)                  | 0.05 | 0.04 | 0.04 | 0.04 | 0.04        | 0.05        | 0.06        |
| <sup>194</sup> Pt(LR)                  | 0.03 | 0.02 | 0.01 | 0.02 | 0.02        | 0.03        | 0.03        |
| <sup>195</sup> Pt(LR)                  | 0.01 | 0.01 | 0.01 | 0.02 | 0.02        | 0.03        | 0.03        |
| <sup>196</sup> Pt(LR)                  | 0.02 | 0.02 | 0.02 | 0.02 | 0.02        | 0.03        | 0.04        |
| <sup>85</sup> Rb(LR)                   | 1    | 1    | 2    | 1    | 1           | <b>3</b>    | <b>6</b>    |
| <sup>185</sup> Re(LR)                  | 0.00 | 0.00 | 0.00 | 0.00 | 0.00        | 0.00        | <b>0.03</b> |
| <sup>187</sup> Re(LR)                  | 0.00 | 0.00 | 0.00 | 0.00 | 0.01        | <b>0.02</b> | <b>0.13</b> |
| <sup>103</sup> Rh(LR)                  | 0.00 | 0.00 | 0.00 | 0.01 | <b>0.02</b> | <b>0.06</b> | <b>0.6</b>  |
| <sup>99</sup> Ru(LR)                   | 0.00 | 0.00 | 0.00 | 0.02 | <b>0.03</b> | <b>0.2</b>  | <b>1</b>    |
| <sup>101</sup> Ru(LR)                  | 0.01 | 0.01 | 0.01 | 0.01 | <b>0.05</b> | <b>0.2</b>  | <b>2</b>    |
| <sup>102</sup> Ru(LR)                  | 0.05 | 0.05 | 0.05 | 0.1  | 0.1         | <b>0.5</b>  | <b>3</b>    |
| <sup>32</sup> S(MR)                    | 7000 | 5000 | 5000 | 5000 | 5000        | 6000        | 5000        |
| <sup>121</sup> Sb(LR)                  | 0.1  | 0.1  | 0.1  | 0.1  | 0.1         | 0.2         | <b>0.9</b>  |
| <sup>123</sup> Sb(LR)                  | 0.05 | 0.1  | 0.1  | 0.1  | 0.1         | 0.1         | <b>0.4</b>  |
| <sup>45</sup> Sc(MR)                   | 0.01 | 0.02 | 0.03 | 0.03 | 0.03        | <b>0.3</b>  | <b>0.8</b>  |
| <sup>82</sup> Se(LR)                   | 40   | 20   | 10   | 10   | 10          | 20          | <b>200</b>  |
| <sup>28</sup> Si(MR)                   | 2000 | 2000 | 1000 | 2000 | 2000        | 3000        | <b>5000</b> |
| <sup>147</sup> Sm(LR)                  | 0.03 | 0.03 | 0.03 | 0.02 | 0.03        | 0.03        | 0.04        |
| <sup>149</sup> Sm(LR)                  | 0.03 | 0.03 | 0.03 | 0.03 | 0.03        | 0.03        | 0.03        |
| <sup>118</sup> Sn(LR)                  | 4    | 4    | 4    | 3    | 3           | 4           | 4           |
| <sup>120</sup> Sn(LR)                  | 4    | 4    | 4    | 4    | 3           | 3           | 4           |
| <sup>88</sup> Sr(LR)                   | 2    | 2    | 2    | 2    | 2           | 2           | 3           |
| <sup>181</sup> Ta(LR)                  | 0.2  | 0.2  | 0.2  | 0.2  | 0.3         | 0.3         | <b>0.8</b>  |
| <sup>159</sup> Tb(LR)                  | 0.06 | 0.04 | 0.03 | 0.03 | 0.04        | 0.04        | 0.04        |
| <sup>125</sup> Te(LR)                  | 0.05 | 0.06 | 0.04 | 0.02 | 0.06        | 0.06        | <b>1</b>    |
| <sup>126</sup> Te(LR)                  | 0.3  | 0.2  | 0.1  | 0.05 | 0.2         | <b>0.5</b>  | <b>5</b>    |
| <sup>232</sup> Th(LR)                  | 0.1  | 0.1  | 0.1  | 0.1  | 0.1         | 0.1         | 0.2         |
| <sup>47</sup> Ti(MR)                   | 3    | 3    | 4    | 4    | 3           | 3           | <b>8</b>    |
| <sup>205</sup> Tl(LR)                  | 0.1  | 0.1  | 0.1  | 0.1  | 0.1         | 0.1         | 0.1         |
| <sup>169</sup> Tm(LR)                  | 0.00 | 0.00 | 0.00 | 0.00 | 0.00        | 0.00        | 0.00        |
| <sup>238</sup> U(LR)                   | 0.05 | 0.06 | 0.06 | 0.04 | 0.05        | 0.06        | 0.08        |
| <sup>184</sup> W(LR)                   | 0.04 | 0.04 | 0.03 | 0.03 | 0.02        | 0.03        | 0.07        |
| <sup>51</sup> V(MR)                    | 0.4  | 0.4  | 0.2  | 0.2  | 0.2         | 0.4         | 0.3         |
| <sup>89</sup> Y(LR)                    | 0.09 | 0.08 | 0.07 | 0.07 | 0.08        | 0.1         | <b>4</b>    |
| <sup>171</sup> Yb(LR)                  | 0.01 | 0.01 | 0.01 | 0.01 | 0.01        | 0.01        | 0.01        |
| <sup>173</sup> Yb(LR)                  | 0.01 | 0.01 | 0.01 | 0.01 | 0.01        | 0.01        | 0.01        |
| <sup>66</sup> Zn(MR)                   | 20   | 20   | 30   | 40   | 40          | 40          | <b>70</b>   |
| <sup>90</sup> Zr(LR)                   | 0.5  | 0.6  | 0.6  | 0.5  | 0.5         | 1           | <b>3</b>    |
